# Supplementary material for: A chromosome-level genome assembly of Neotoxoptera formosana (Takahashi, 1921) (Hemiptera: Aphididae)
Source: G3 (Bethesda). 2022 Jul 1;12(8):jkac164. doi: 10.1093/g3journal/jkac164 (PMC9339310; doi:10.1093/g3journal/jkac164)
Supplement: jkac164_Supplementary_Data [file jkac164_supplementary_data.xlsx]

## Sheet: Table S1
Table S1. Repeat annotation in the Neotoxoptera formosana genome.
Class	Copies	Length (bp)	Percentage of the genome (bp)
DNA	58425	13227532	0.0356
Academ	74	32831	0.0001
Academ-1	373	70834	0.0002
Academ-2	5	325	0
Academ-H	3	153	0
CMC-Chapaev	535	25932	0.0001
CMC-Chapaev-3	88	6692	0
CMC-EnSpm	7413	695635	0.0019
CMC-Mirage	2	112	0
CMC-Transib	512	103398	0.0003
Crypton	129	5979	0
Crypton-A	14	846	0
Crypton-C	2	145	0
Crypton-F	5	240	0
Crypton-H	307	14674	0
Crypton-I	1	48	0
Crypton-S	14	730	0
Crypton-V	581	25968	0.0001
Crypton-X	6	278	0
Dada	591	25200	0.0001
Ginger-1	2655	299260	0.0008
Ginger-2	2847	638217	0.0017
IS3EU	695	36013	0.0001
Kolobok	12	621	0
Kolobok-E	14002	2360449	0.0064
Kolobok-H	7	417	0
Kolobok-Hydra	76	4478	0
Kolobok-T2	1973	211024	0.0006
MULE	1	44	0
MULE-F	3	156	0
MULE-MuDR	13908	2736871	0.0074
MULE-NOF	3478	786626	0.0021
MULE-Ricksha	69	6471	0
Maverick	1974	912600	0.0025
Maverick-Mavirus	2	86	0
Merlin	1484	244116	0.0007
Novosib	74	3243	0
P	3374	1155699	0.0031
P-Fungi	3	212	0
PIF	1	97	0
PIF-HarbS	6	257	0
PIF-Harbinger	1290	208703	0.0006
PIF-ISL2EU	344	103927	0.0003
PIF-Spy	173	10175	0
PiggyBac	852	233562	0.0006
PiggyBac-A	1	66	0
PiggyBac-X	5	243	0
Sola	16	4822	0
Sola-1	1819	455392	0.0012
Sola-2	175	12657	0
Sola-3	98	5787	0
TcMar	141	6393	0
TcMar-Ant1	4	245	0
TcMar-Cweed	2	125	0
TcMar-Fot1	614	95190	0.0003
TcMar-Gizmo	1	62	0
TcMar-IS885	3	134	0
TcMar-ISRm11	74	3235	0
TcMar-Mariner	591	125919	0.0003
TcMar-Pogo	3243	491058	0.0013
TcMar-Sagan	11	635	0
TcMar-Stowaway	62	2930	0
TcMar-Tc1	1773	230561	0.0006
TcMar-Tc2	14	697	0
TcMar-Tc4	304	60305	0.0002
TcMar-Tigger	885	175555	0.0005
TcMar-m44	2640	492832	0.0013
Zator	14	873	0
Zisupton	2236	129913	0.0003
hAT	13744	2668800	0.0072
hAT-Ac	8174	1456429	0.0039
hAT-Blackjack	1710	370991	0.001
hAT-Charlie	13760	2345154	0.0063
hAT-Pegasus	111	48042	0.0001
hAT-Tag1	257	18558	0
hAT-Tip100	24356	5263389	0.0142
hAT-hAT1	1	62	0
hAT-hAT19	18750	4388198	0.0118
hAT-hAT5	17	3318	0
hAT-hAT6	6	269	0
hAT-hATm	725	167659	0.0005
hAT-hATw	28	1529	0
hAT-hATx	248	45189	0.0001
hAT-hobo	27	1918	0
LINE	35	2151	0
CR1	5115	1649540	0.0044
CR1-Zenon	32	2073	0
CRE	42	2262	0
CRE-Ambal	45	2428	0
CRE-Odin	12	699	0
Deceiver	2	108	0
Dong-R4	23	1154	0
Dualen	37	1598	0
I	4019	1315061	0.0035
I-Jockey	7225	1963375	0.0053
L1	1375	72742	0.0002
L1-DRE	34	1810	0
L1-Tx1	277	17057	0
L1-Zorro	2	127	0
L2	4294	780498	0.0021
Penelope	1471	74463	0.0002
Proto1	21	1264	0
Proto2	12	564	0
R1	2168	768146	0.0021
R1-LOA	51	2807	0
R2	175	23792	0.0001
R2-Hero	40	1957	0
R2-NeSL	233	54362	0.0001
RTE	7	470	0
RTE-BovB	1254	442222	0.0012
RTE-ORTE	3	176	0
RTE-RTE	22	1350	0
RTE-X	159	8468	0
Rex-Babar	74	3538	0
Tad1	51	3094	0
LTR	102	20951	0.0001
Caulimovirus	104	5815	0
Copia	1673	302192	0.0008
DIRS	260	30572	0.0001
DIRS-Q	1	58	0
ERV-Foamy	1	65	0
ERV1	1047	71945	0.0002
ERV4	56	2140	0
ERVK	353	18060	0
ERVL	83	3240	0
ERVL-MaLR	3	130	0
Gypsy	8460	2742917	0.0074
Ngaro	318	16743	0
Pao	1854	787006	0.0021
Unknown	1859	534932	0.0014
Viper	2	92	0
Other	--	--	--
DNA_virus	9	537	0
RC	--	--	--
Helitron	14443	2912698	0.0078
Helitron-2	45	2073	0
Retroposon	49694	12965903	0.0349
L2-derived	3	169	0
SVA	1	38	0
SINE	331	90411	0.0002
7SL	2	595	0
B4	6	236	0
Ceph	4	189	0
ID	12	678	0
MIR	9	395	0
U	2	47	0
tRNA	65	3054	0
tRNA-5S	1	19	0
tRNA-CR1	1	31	0
tRNA-Core	29	1152	0
tRNA-Deu	2	19	0
tRNA-Deu-L2	4	189	0
tRNA-I	1	32	0
tRNA-L2	6	387	0
tRNA-Meta	22	1140	0
tRNA-R2	1	76	0
tRNA-RTE	11	661	0
tRNA-V	1	62	0
tRNA-V-CR1	1	11	0
Segmental	2	96	0
Unknown	133866	26906829	0.0724
centromeric	1	48	0
Total_interspersed	458084	97889999	0.2635
Low_complexity	28500	2732360	0.0074
Satellite	645	75295	0.0002
Y-chromosome	3	174	0
acro	5	253	0
macro	31	1055	0
subtelo	1	84	0
Simple_repeat	267067	15176317	0.0409
rRNA	271	75493	0.0002
snRNA	41	4501	0
tRNA	191	11601	0
Total	754839	115967132	0.3122

## Sheet: Table S2
Table S2. Annotations of non-coding RNAs in the Neotoxoptera formosana genome.
Class	Copies	Description
rRNA			5.8S ribosomal RNA
5_8S_rRNA	4	rRNA	5S ribosomal RNA
5S_rRNA	52	rRNA	Archaeal large subunit ribosomal RNA
LSU_rRNA_archaea	1	rRNA	Bacterial large subunit ribosomal RNA
LSU_rRNA_bacteria	1	rRNA	Eukaryotic large subunit ribosomal RNA
LSU_rRNA_eukarya	19	rRNA	Eukaryotic small subunit ribosomal RNA
SSU_rRNA_eukarya	12	rRNA
miRNA			mir-1 microRNA precursor family
mir-1	1	miRNA	mir-10 microRNA precursor family
mir-10	6	miRNA	mir-1000 microRNA precursor family
mir-1000	1	miRNA	mir-1175 microRNA precursor family
mir-1175	1	miRNA	mir-124 microRNA precursor family
mir-124	1	miRNA	microRNA mir-137
mir-137	1	miRNA	microRNA mir-14
mir-14	1	miRNA	microRNA mir-184
mir-184	2	miRNA	microRNA mir-190
mir-190	1	miRNA	mir-1923 microRNA precursor family
mir-1923	1	miRNA	mir-2 microRNA precursor
mir-2	4	miRNA	mir-219 microRNA precursor family
mir-219	1	miRNA	microRNA mir-252
mir-252	1	miRNA	microRNA mir-276
mir-276	1	miRNA	microRNA mir-277
mir-277	1	miRNA	mir-3015 microRNA precursor family
mir-3015	8	miRNA	microRNA mir-3017
mir-3017	75	miRNA	mir-3047 microRNA precursor family
mir-3047	7	miRNA	microRNA mir-315
mir-315	1	miRNA	mir-46/mir-47/mir-281 microRNA precursor family
mir-46	1	miRNA	microRNA mir-67
mir-67	1	miRNA	mir-7 microRNA precursor
mir-7	1	miRNA	microRNA mir-71
mir-71	1	miRNA	mir-8/mir-141/mir-200 microRNA precursor family
mir-8	1	miRNA	mir-9/mir-79 microRNA precursor family
mir-9	2	miRNA	mir-92_2 microRNA precursor family
mir-92_2	1	miRNA	microRNA mir-927
mir-927	1	miRNA	microRNA mir-929
mir-929	1	miRNA	mir-965 microRNA precursor family
mir-965	1	miRNA	mir-971 microRNA precursor family
mir-971	1	miRNA	mir-iab-4 microRNA precursor family
mir-iab-4	1	miRNA
snRNA			Small nucleolar RNA Me28S-Am982
snoMe28S-Am982	4	snRNA; snoRNA; CD-box	Small nucleolar RNA R38
snoR38	7	snRNA; snoRNA; CD-box	Small nucleolar RNA SNORD18
SNORD18	1	snRNA; snoRNA; CD-box	Small nucleolar RNA SNORD31
SNORD31	1	snRNA; snoRNA; CD-box	Small nucleolar RNA Z195/SNORD33/SNORD32 family
SNORD33	10	snRNA; snoRNA; CD-box	Small nucleolar RNA SNORD36
SNORD36	3	snRNA; snoRNA; CD-box	Small nucleolar RNA SNORD57
SNORD57	1	snRNA; snoRNA; CD-box	Small nucleolar RNA SNORD96 family
SNORD96	1	snRNA; snoRNA; CD-box	Small nucleolar RNA snR60/Z15/Z230/Z193/J17
snosnR60_Z15	7	snRNA; snoRNA; CD-box	Small nucleolar RNA snR61/Z1/Z11
snosnR61	1	snRNA; snoRNA; CD-box	U1 spliceosomal RNA
U1	17	snRNA; splicing	U11 spliceosomal RNA
U11	1	snRNA; splicing	U12 minor spliceosomal RNA
U12	1	snRNA; splicing	U2 spliceosomal RNA
U2	10	snRNA; splicing	Small nucleolar RNA U3
U3	11	snRNA; snoRNA; CD-box	U4 spliceosomal RNA
U4	4	snRNA; splicing	U4atac minor spliceosomal RNA
U4atac	1	snRNA; splicing	U5 spliceosomal RNA
U5	10	snRNA; splicing	U6 spliceosomal RNA
U6	5	snRNA; splicing	U6atac minor spliceosomal RNA
U6atac	1	snRNA; splicing
lncRNA			Sphinx_ conserved region 1
Sphinx_1	2	lncRNA	Sphinx conserved region 2
Sphinx_2	2	lncRNA
ribozyme			drz-agam-1 ribozyme
drz-agam-1	24	ribozyme	RNase MRP
RNase_MRP	1	ribozyme	Bacterial RNase P class A
RNaseP_bact_a	1	ribozyme	Nuclear RNase P
RNaseP_nuc	1	ribozyme
tRNA
tRNA-Ala	11	tRNA
tRNA-Arg	13	tRNA
tRNA-Asn	10	tRNA
tRNA-Asp	16	tRNA
tRNA-Cys	3	tRNA
tRNA-Gln	8	tRNA
tRNA-Glu	12	tRNA
tRNA-Gly	15	tRNA
tRNA-His	6	tRNA
tRNA-Ile	7	tRNA
tRNA-iMet/Met	13	tRNA
tRNA-Leu	16	tRNA
tRNA-Lys	20	tRNA
tRNA-Phe	6	tRNA
tRNA-Pro	13	tRNA
tRNA-Ser	15	tRNA
tRNA-Thr	11	tRNA
tRNA-Trp	5	tRNA
tRNA-Tyr	11	tRNA
tRNA-Val	14	tRNA
Others
Bacteria_small_SRP	1	Bacterial small signal recognition particle RNA
Histone3	139	Histone 3' UTR stem-loop
IRE_II	2	Iron response element II
K_chan_RES	5	Potassium channel RNA editing signal
Metazoa_SRP	2	Metazoan signal recognition particle RNA
	149
Total	719
